# Supplementary material for: Overlapping genes: a window on gene evolvability
Source: Springer Nature journal article supplement (doi:10.1186/1471-2164-15-721), 2014-01-01
Supplement: 12864_2013_6422_MOESM4_ESM.pdf [file 12864_2013_6422_MOESM4_ESM.pdf]

## Gene extremities without UTR

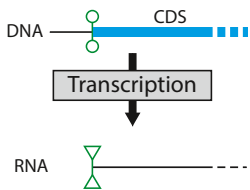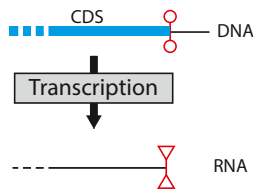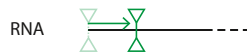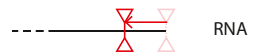

## Gene extremities with UTR or inside operon

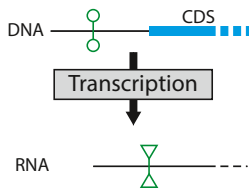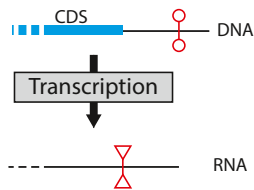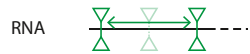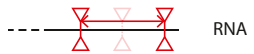

Potential position for alternative Start or Stop codons

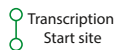

Transcription Start site

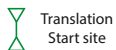

Translation Start site

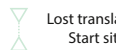

Lost translation Start site

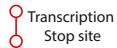

Transcription Stop site

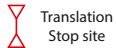

Translation Stop site

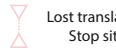

Lost translation Stop site
