# Supplementary figures and images for: Overlapping genes: a window on gene evolvability
Source: Springer Nature journal article supplement (doi:10.1186/1471-2164-15-721), 2014-01-01

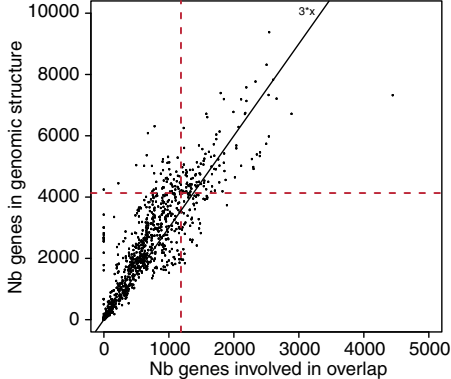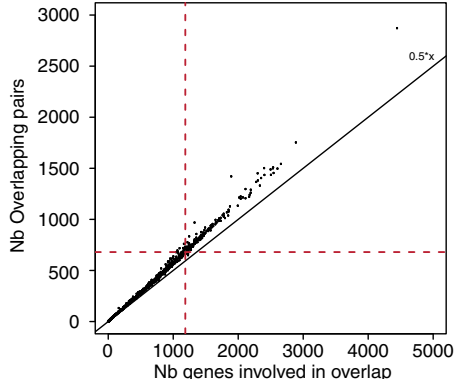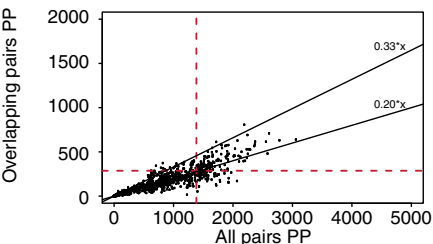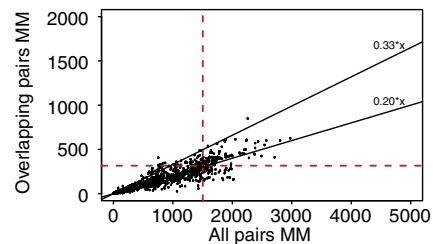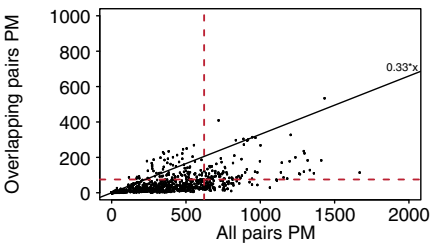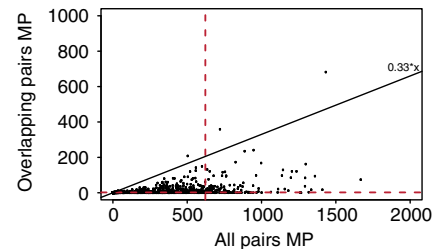

Supplement: 12864_2013_6422_MOESM1_ESM.pdf [file 12864_2013_6422_MOESM1_ESM.pdf]

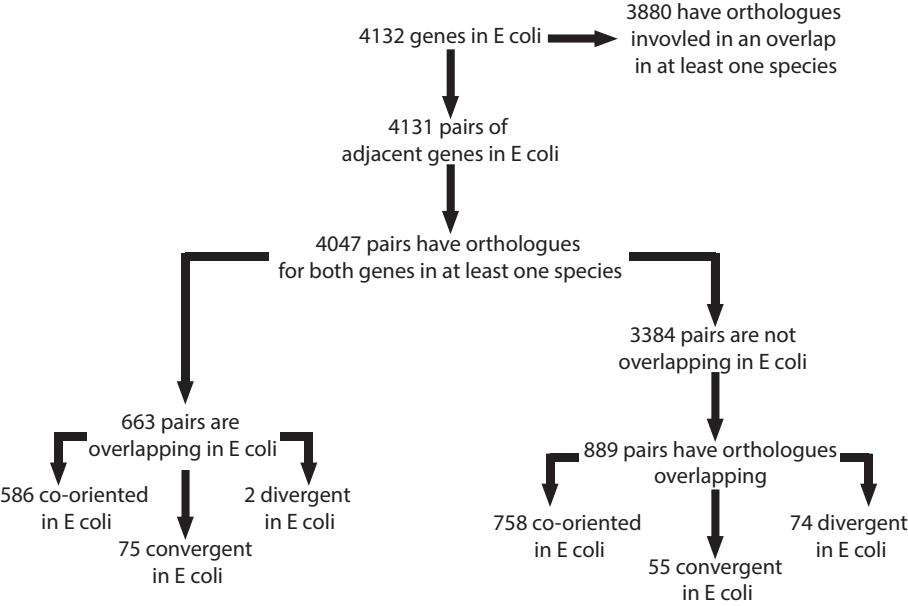

Supplement: 12864_2013_6422_MOESM2_ESM.pdf [file 12864_2013_6422_MOESM2_ESM.pdf]

a)

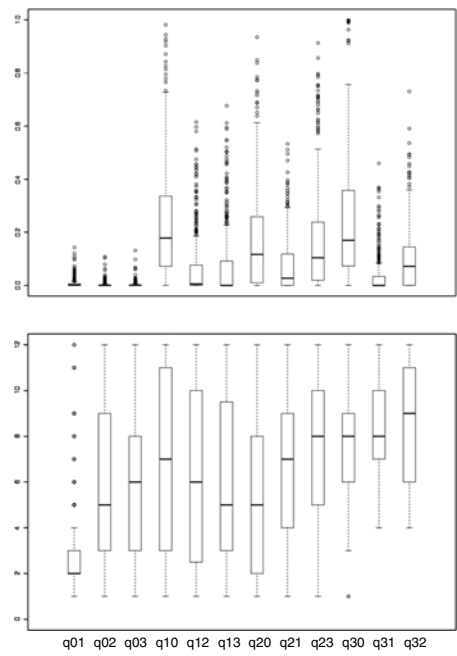

b)

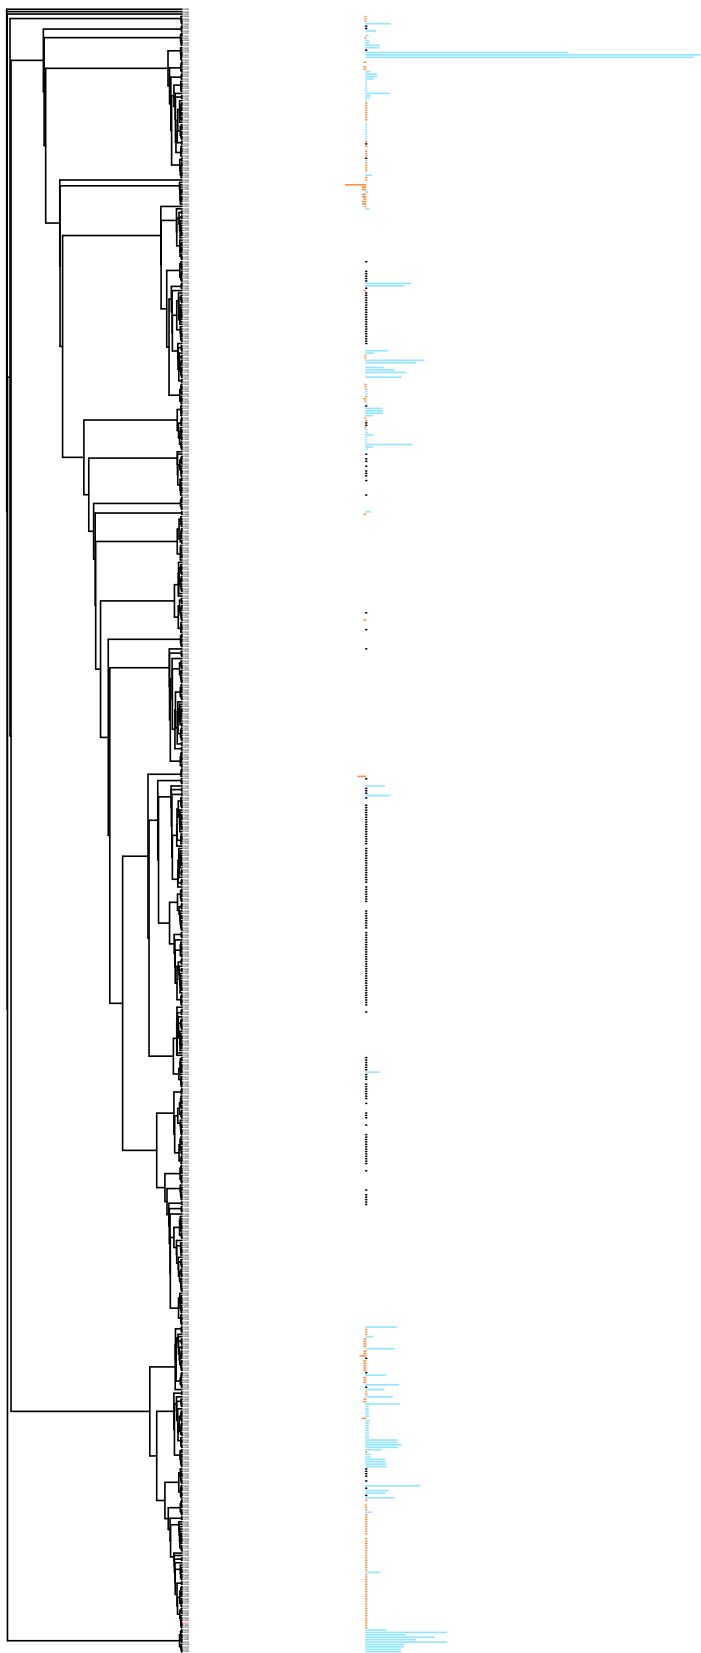

Supplement: 12864_2013_6422_MOESM3_ESM.pdf [file 12864_2013_6422_MOESM3_ESM.pdf]
